# Supplementary material for: Photoluminescence Sensing of Chloride Ions in Sea Sand Using Alcohol-Dispersed CsPbBr3@SiO2 Perovskite Nanocrystal Composites
Source: MDPI journal article supplement (doi:10.3390/chemosensors10050170), 2022-05-02
Supplement: s1 [file s1]

## Support Information:

# Photoluminescence Sensing of Chloride Ions in Sea Sand Using Alcohol-Dispersed CsPbBr<sub>3</sub>@SiO<sub>2</sub> Perovskite Nanocrystal Composites

Henggan Li <sup>1,†</sup>, Feiming Li <sup>2,3,†</sup>, Yipeng Huang <sup>2</sup>, Linchun Zhang <sup>2</sup>, Min Ye <sup>2</sup>, Jingwen Jin <sup>2</sup> and Xi Chen <sup>2,\*</sup>

<sup>1</sup> Department of Civil Engineering and Architecture, Wuyi University, Wuyishan 354300, China; lhg@wuyiu.edu.cn

<sup>2</sup> Department of Chemistry and the MOE Key Laboratory of Spectrochemical Analysis & Instrumentation, College of Chemistry and Chemical Engineering, Xiamen University, Xiamen 361000, China; lfm1914@mnnu.edu.cn (F.L.); huangyp@glut.edu.cn (Y.H.); 20520191151446@stu.xmu.edu.cn (L.Z.); 20520201151887@stu.xmu.edu.cn (M.Y.); 20520191151435@stu.xmu.edu.cn (J.J.)

<sup>3</sup> College of Chemistry, Chemical Engineering and Environment, Minnan Normal University, Zhangzhou 363000, China

\* Correspondence: xichen@xmu.edu.cn; Tel.: +86-592-2184530

† These authors contributed equally to this work.

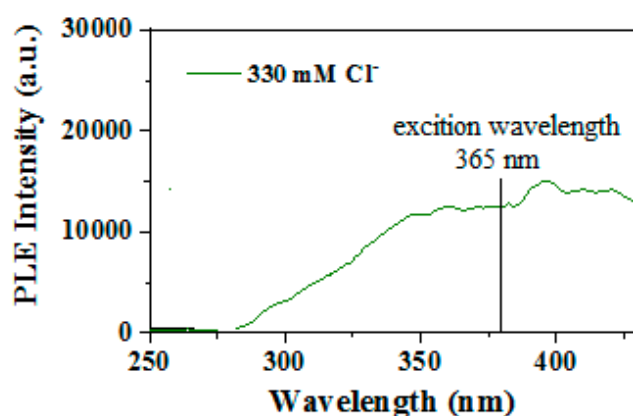

**Figure S1.** Excitation spectrum of CsPbBr<sub>3</sub>@SiO<sub>2</sub> PNCCs in the solution of 1.92% (330 mmol/L) Cl<sup>-</sup>; excitation slit width, 1.5 nm; emission slit width, 5.5 nm, scan rate: 1200 nm·min<sup>-1</sup>

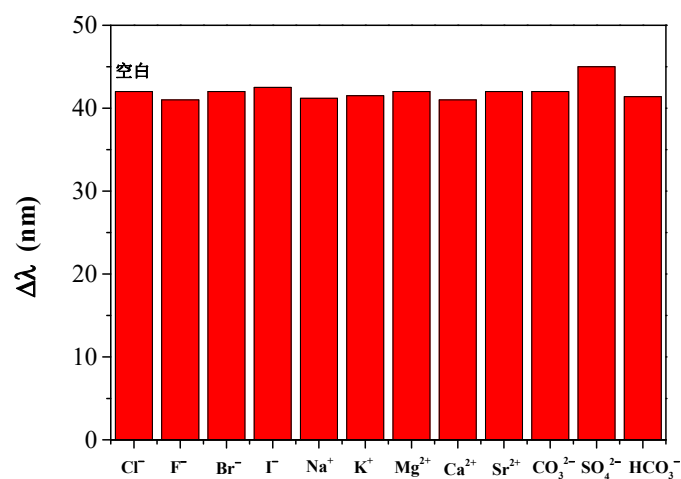

**Figure S2.** The selectivity investigation on Cl<sup>-</sup> determination in sea water based on CsPbBr<sub>3</sub>@SiO<sub>2</sub> PNCCs halide exchanges with Cl<sup>-</sup> (330 mmol/L). The potential coexistent ions in sea water from left to right were 20 μmol/L F<sup>-</sup>, 0.7mmol/L Br<sup>-</sup>, 5 μmol/L I<sup>-</sup>, 300 mmol/L Na<sup>+</sup>, 10 mmol/L K<sup>+</sup>, 20 mmol/L Mg<sup>2+</sup>, 10 mmol/L Ca<sup>2+</sup>, 50 μmol/L Sr<sup>2+</sup>, 5 mmol/L CO<sub>3</sub><sup>2-</sup>, 20 mmol/L SO<sub>4</sub><sup>2-</sup>, 5 mmol/L HCO<sub>3</sub><sup>-</sup>.

**Table S1.** The determination of Cl<sup>-</sup> in sea water.

| Sample | Concentration of NaCl (%) | RSD (% , n=3) | Added amount (%) * | Obtained (%) | Recovery (%) |
|--------|---------------------------|---------------|--------------------|--------------|--------------|
| 1      | 2.14                      | 3.5           | 1.00               | 2.93         | 93.3         |
| 2      | 2.15                      | 2.8           | 1.00               | 3.04         | 96.6         |
| 3      | 2.12                      | 0.8           | 1.00               | 2.91         | 93.3         |
| 4      | 2.13                      | 11.0          | 1.00               | 2.82         | 90.0         |
| 5      | 2.15                      | 5.3           | 1.00               | 2.88         | 91.6         |

\*1.000 g NaCl was added to each 100 mL seawater sample
